# Supplementary material
Source: HighWire-hosted journal article supplement (http://www.qdcxjkg.com/highwire/filestream/130564/field_highwire_adjunct_files/0/ERJ-01698-2015_Supplement.pdf)
Supplement: ERJ-01698-2015_Supplement.pdf [file ERJ-01698-2015_Supplement.pdf]

**Table S1**

Unit costs

| Type of resource                          | Unit cost (2014 €) |
|-------------------------------------------|--------------------|
| Pharmacy fee per prescription             | 7.85               |
| GP, consultation                          | 30.85              |
| GP, phone consultation                    | 15.43              |
| GP, home visit                            | 47.38              |
| Nurse practitioner, consultation          | 29.75              |
|                                           |                    |
| Pulmonologist/pediatrician, consult       | 79.33              |
| Pulmonologist/pediatrician, phone consult | 39.67              |
| Emergency room visit                      | 166.38             |
| Inpatient hospital day                    | 479.29             |
| Treatment without overnight stay          | 276.56             |
|                                           |                    |
| Production loss, mother, per day          | 257.83             |
| Production loss, father, per day          | 300.05             |

**Table S2a**

Mean adjusted adherence, during first six months and last six months, intention to treat analysis.

|                          | Intervention<br>(n=101) <sup>#</sup> | 95%CI       | Control<br>(n=108) <sup>#</sup> | 95%CI       | Difference | 95%CI      |
|--------------------------|--------------------------------------|-------------|---------------------------------|-------------|------------|------------|
| Full study period        | 69.3%                                | 65.5%;73.4% | 57.3%                           | 52.8%;61.7% | 12.0%      | 6.7%;17.7% |
| First six months period  | 73.1%                                | 69.3%;76.6% | 58.1%                           | 53.8%;62.5% | 15.0%      | 9.3%;20.7% |
| Second six months period | 65.4%                                | 60.6%;71.3% | 56.5%                           | 50.8%;62.6% | 9.0%       | 2.4%;16.3% |

**Table S2b**

Mean adjusted adherence, during first six months and last six months, per-protocol analysis of all patients with a minimum follow-up of 90 days after randomization

|                          | Intervention<br>(n=87) <sup>#</sup> | 95%CI       | Control<br>(n=99) <sup>#</sup> | 95%CI       | Difference | 95%CI      |
|--------------------------|-------------------------------------|-------------|--------------------------------|-------------|------------|------------|
| Full study period        | 71.3%                               | 67.5%;75.5% | 59.8%                          | 55.8%;65.0% | 11.4%      | 5.9%;17.0% |
| First six months period  | 75.2%                               | 71.5%;78.6% | 60.7%                          | 56.5%;65.3% | 14.4%      | 8.4%;20.1% |
| Second six months period | 67.3%                               | 62.7%;73.3% | 58.9%                          | 53.6%;67.0% | 8.4%       | 1.8%;15.2% |

**Table S2c**

Mean adjusted adherence, during first six months and last six months, modified per-protocol analysis of all patients with a minimum follow-up of 180 days days after randomisation

|                          | Intervention<br>(n=72) | 95%CI       | Control<br>(n=82) | 95%CI       | Difference | 95%CI      |
|--------------------------|------------------------|-------------|-------------------|-------------|------------|------------|
| Full study period        | 75.0%                  | 71.8;78.2%  | 63.9%             | 59.4%;68.3% | 11.1%      | 5.7%;17.1% |
| First six months period  | 79.0%                  | 75.8%;82.3% | 65.0%             | 60.2%;69.5% | 14.0%      | 8.3%;20.4% |
| Second six months period | 70.9%                  | 66.7%;75.0% | 62.9%             | 60.2%;69.5% | 8.1%       | 1.6%;14.6% |

**Table S2d**

Mean adjusted adherence, during first six months and last six months, modified per-protocol analysis all patients with a minimum follow-up of 270 days after randomisation

|                         | Intervention<br>(n=62) <sup>#</sup> | 95%CI       | Control<br>(n=67) <sup>#</sup> | 95%CI       | Difference | 95%CI      |
|-------------------------|-------------------------------------|-------------|--------------------------------|-------------|------------|------------|
| Full study period       | 77.2%                               | 74.1%;80.2% | 67.3%                          | 62.9%;71.8% | 9.9%       | 4.2%;15.4% |
| First six month period  | 81.1%                               | 77.9%;84.4% | 68.0%                          | 63.1%;72.9% | 13.1%      | 6.9%;18.9% |
| Second six month period | 73.4%                               | 69.3%;77.1% | 66.6%                          | 61.5%;72.2% | 6.7%       | 0.0%;13.0% |

<sup>#</sup> There are slight differences between the numbers of patients in figure 2 and in this Appendix. This is due to incidental missing values and to different cut-off points for monthly adherence and follow-up.

**Figure S3**

Adjusted mean c-ACT-score per treatment group, and the difference, over the course of the study period.

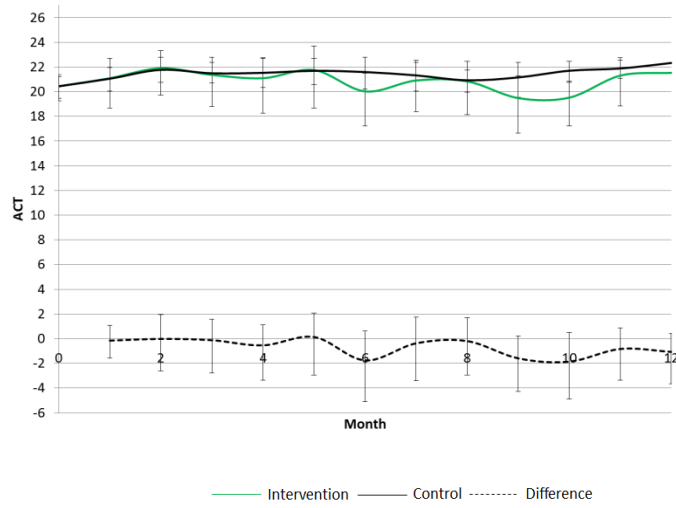

**Table S4**

Healthcare resource use (mean, standard deviation) per patient, unadjusted for time in study

| <b>Resource</b>                   | <b>Intervention (n=101)</b> | <b>Control (n=108)</b> |
|-----------------------------------|-----------------------------|------------------------|
| GP, consultations                 | 0.60 (1.56)                 | 0.49 (1.27)            |
| GP, phone calls                   | 0.020 (0.14)                | 0.074 (0.35)           |
| GP, home visits                   | 0 (0)                       | 0.056 (0.43)           |
| Nurse practitioner, consultations | 0.0099 (0.10)               | 0.0093 (0.096)         |
| Outpatient hospital visits        | 1.65 (2.07)                 | 1.83 (1.85)            |
| Emergency room visits             | 0 (0)                       | 0.06 (0.5)             |
| Day-care treatment in hospital    | 0 (0)                       | 0.065 (0.67)           |
| Inpatient hospital days           | 0 (0)                       | 0.10 (0.77)            |
| Hospital, phone calls             | 0.13 (0.39)                 | 0.19 (0.63)            |
| Absence from work, days           | 0.88 (3.06)                 | 0.33 (1.66)            |

**Table S5**

Mean adjusted costs per treatment group

| Category               | Intervention (€) | 95%CI (€) | Control (€) | 95%CI (€) | Difference (€) | 95%CI (€) |
|------------------------|------------------|-----------|-------------|-----------|----------------|-----------|
| GP                     | 29               | 15;42     | 27          | 16;37     | 2              | -16;19    |
| Hospital               | 171              | 137;219   | 311         | 199;420   | -141           | -241;31   |
| Medication             | 346              | 284;410   | 297         | 252;335   | 50             | -24;132   |
| Production loss        | 312              | 141;453   | 129         | 25;209    | 183            | 14;365    |
| RTMM costs             | 185              |           | 0           |           |                |           |
| Total costs            |                  |           |             |           |                |           |
| Healthcare perspective | 731              | 647;820   | 636         | 491;758   | 96             | -55;271   |
| Societal perspective   | 1043             | 813;1127  | 764         | 583;929   | 297            | -13;437   |
